# Supplementary material for: Order-disorder transition-induced band nestification in AgBiSe2–CuBiSe2 solid solutions for superior thermoelectric performance
Source: Royal Society of Chemistry journal article supplement (doi:10.1039/d0ta08484k), 2020-12-10
Supplement: d0ta08484k1.pdf [file d0ta08484k1.pdf]

## Supporting Information

### Order-Disorder Transition-induced Band Nestification in AgBiSe<sub>2</sub>-CuBiSe<sub>2</sub> Solid Solutions for Superior Thermoelectric Performance

*Hanhwi Jang<sup>a</sup>, Stanley Abbey<sup>b</sup>, Woo Hyun Nam<sup>c</sup>, Brakowaa Frimpong<sup>b</sup>, Chien Viet Nguyen<sup>d</sup>, Sung-Jae Joo<sup>e</sup>, Ho Sun Shin<sup>d</sup>, Jae Yong Song<sup>d</sup>, Eugene N. Cho<sup>f</sup>, Moohyun Kim<sup>a</sup>, Yeon Sik Jung<sup>a\*</sup>, and Min-Wook Oh<sup>b\*</sup>*

<sup>a</sup> Department of Materials Science and Engineering, Korea Advanced Institute of Science and Technology (KAIST), 291 Daehak-ro, Yuseong-gu, Daejeon, 34141, Republic of Korea

<sup>b</sup> Department of Materials Science and Engineering, Hanbat National University, 125 Dongseodae-ro, Yuseong-gu, Daejeon, 34158

<sup>c</sup> Energy Efficiency Materials Center, Korea Institute of Ceramic Engineering and Technology (KICET), Jinju, 52851, Republic of Korea

<sup>d</sup> Korea Research Institute of Standards and Science (KRISS), Daejeon, 34113, Republic of Korea

<sup>e</sup> Energy Conversion Research Center, Korea Electrotechnology Research Institute (KERI), Changwon, 51543, Republic of Korea

<sup>f</sup> KAIST Institute for NanoCentury, Korea Advanced Institute of Science and Technology (KAIST), 291 Daehak-ro, Yuseong-gu, Daejeon 34141, Republic of Korea

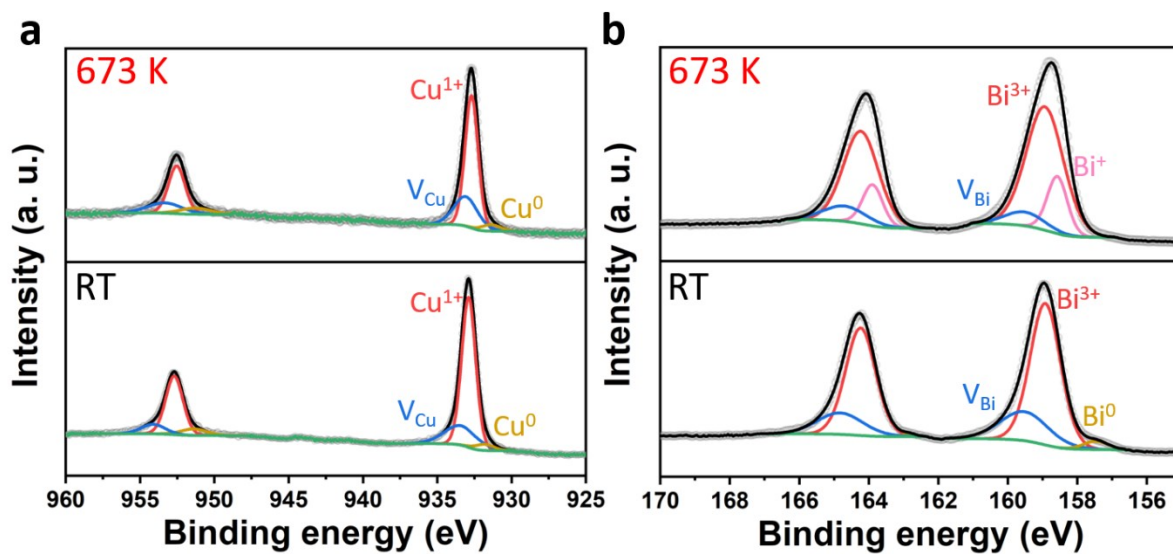

**Figure S1.** In-situ XPS spectrum of (a) Cu 3d scan and (b) Bi 4f scan of CABS-27 at room temperature and 673 K. It was found that most of the Cu consists of Cu with the 1+ valence state, which does not change significantly after a phase transition, meaning that Cu is incorporated into the Ag sites. On the other hand, the XPS spectrum of Bi reveals the existence of both  $\text{Bi}^0$  and  $\text{Bi}^{3+}$  at room temperature.

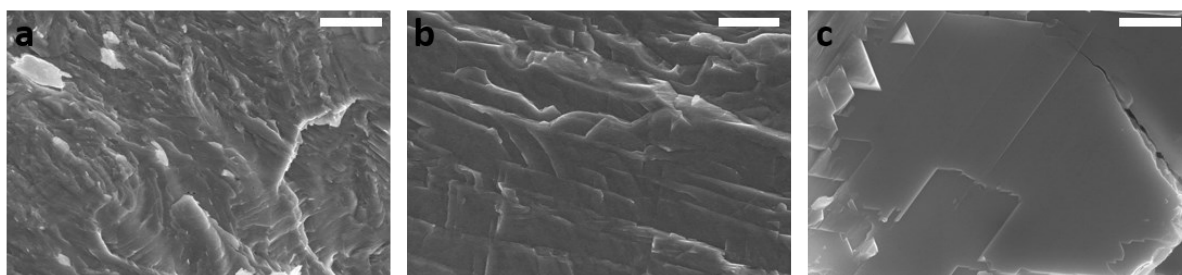

**Figure S2.** Representative SEM image of the fracture surface of (a) CABS-13, (b) CABS-20, and (c) CABS-27. Gradual increase of the average grain size is observed. Scale bar = 2  $\mu\text{m}$ .

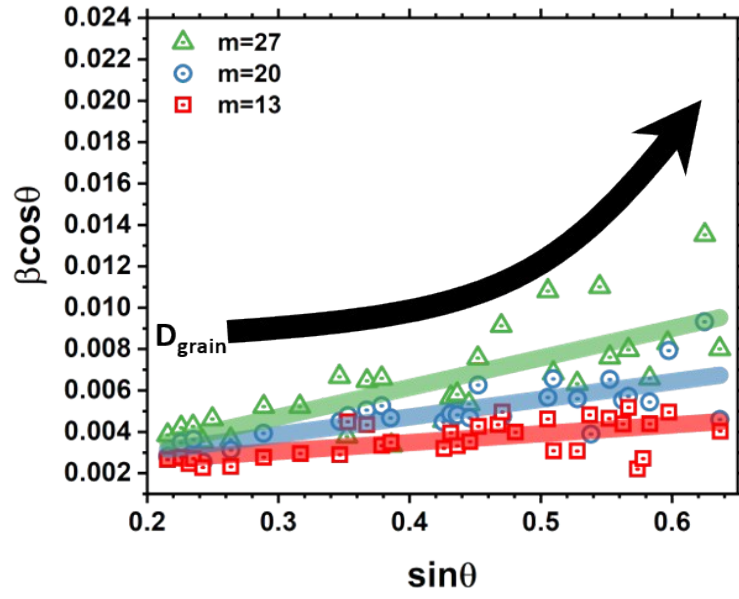

**Figure S3.** Williamson-Hall plot of CABS alloys showing an increase of the average crystallite size by Cu concentration.

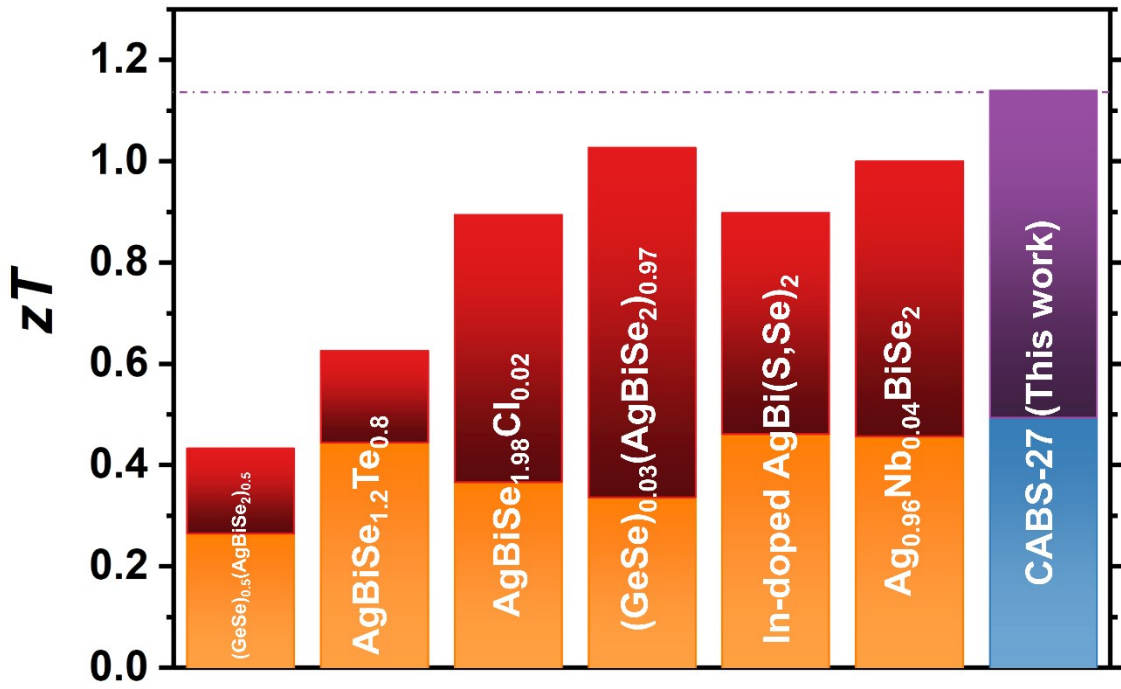

**Figure S4.** Comparison of TE properties among reported AgBiSe<sub>2</sub>-based materials and CABS-27. Upper and lower panel denotes  $zT_{\text{max}}$  and  $zT_{\text{avg}}$ , respectively.

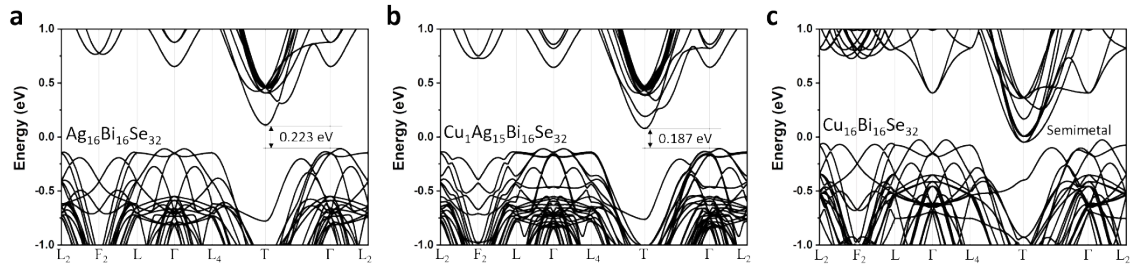

**Figure S5.** Calculated electronic band structure of ABS, CABS, and CBS with the  $L1$  structure. Spin-orbit interaction was not considered in this calculation.

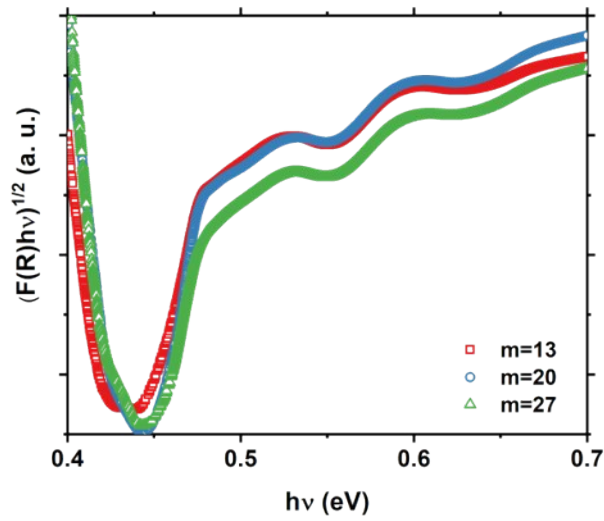

**Figure S6.** Optical absorption spectrum of CABS alloys at room temperature. No significant change of band gap is observed upon Cu alloying.

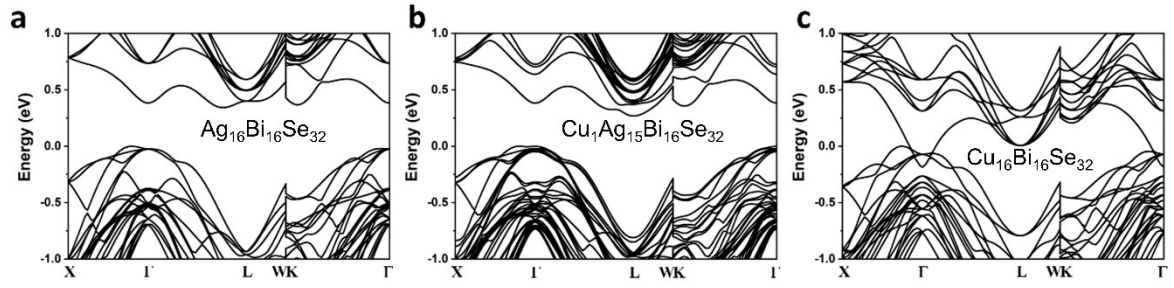

**Figure S7.** Calculated electronic band structure of ABS, CABS, and CBS with the  $D4$  structure. Spin-orbit interaction was considered in this calculation.

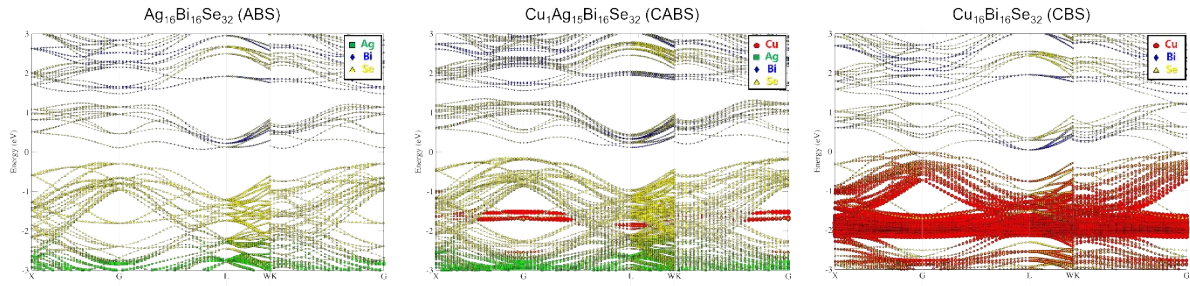

**Figure S8.** Atomic contribution of electronic band in  $\text{Ag}_{16}\text{Bi}_{16}\text{Se}_{32}$  (ABS),  $\text{Cu}_1\text{Ag}_{15}\text{Bi}_{16}\text{Se}_{32}$  (CABS), and  $\text{Cu}_{16}\text{Bi}_{16}\text{Se}_{32}$  (CBS) with the  $D4$  structure.

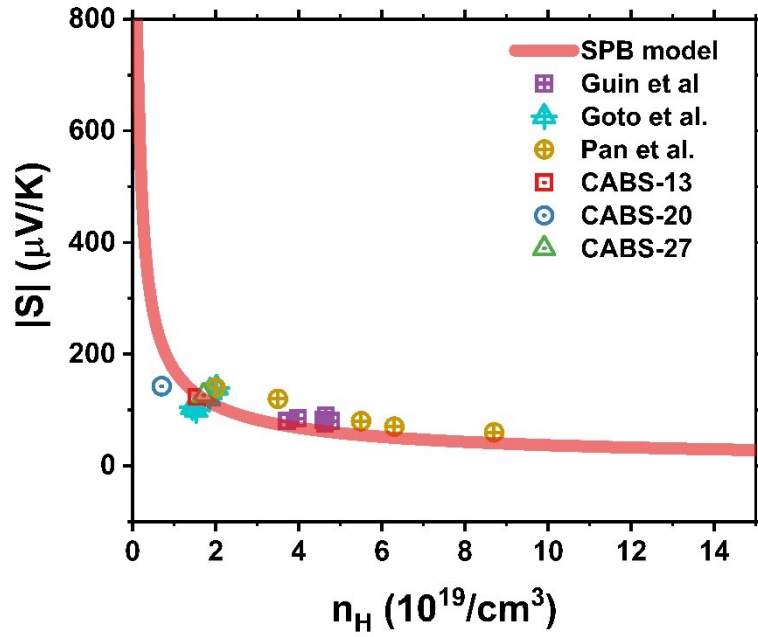

**Figure S9.** Pisarenko plot of CABS alloys and reported AgBiSe<sub>2</sub>-based materials at room temperature. The theoretical Seebeck coefficient expected from the SPB model well describes the behavior of AgBiSe<sub>2</sub>, meaning that the electronic structure is not changed significantly with Cu alloying in hexagonal crystal structure.

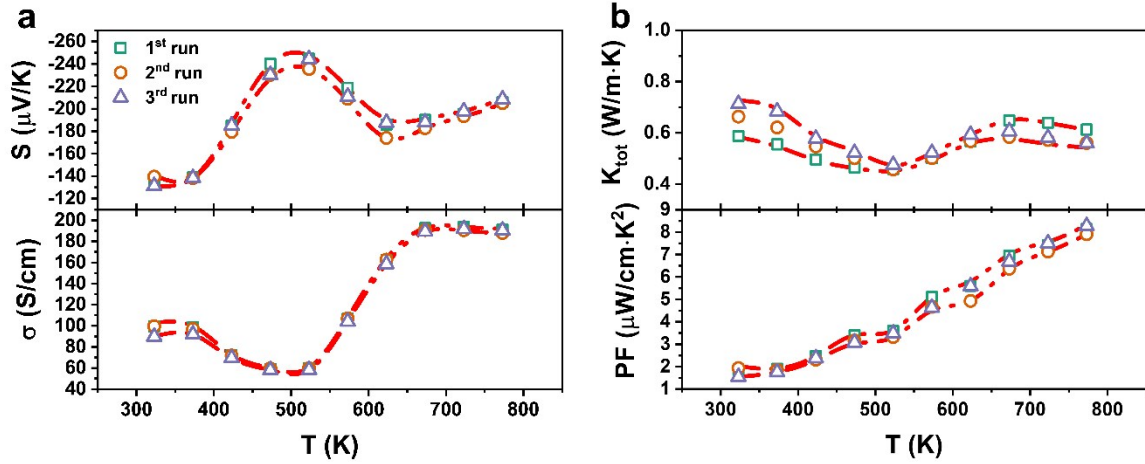

**Figure S10.** Temperature-dependent (a) Seebeck coefficient, electrical conductivity, (b) total thermal conductivity, and power factor of CABS-27 during three heating cycles. Dashed lines mean 95% confidence level of the measured values. Same symbol denotes same measurement trial.

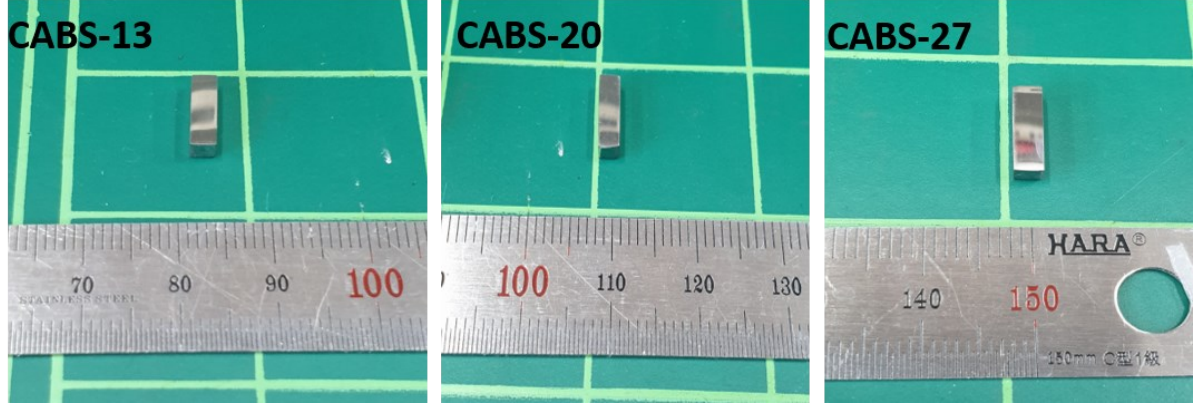

**Figure S11.** Digital photographs of high-quality polycrystalline CABS samples after TE property measurement. Neither significant mechanical deformation nor local melting were observed.

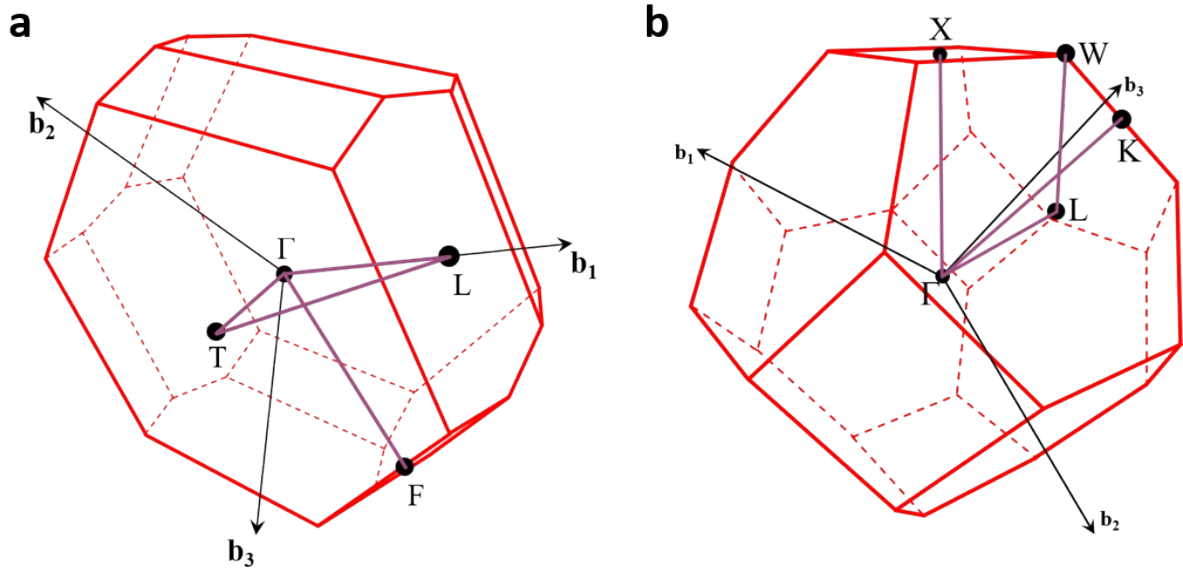

**Figure S12.** Brillouin zone and high symmetry k-points of (a)  $L1_1$  structure and (b)  $D4$  structure. Reciprocal cell vectors are denoted as  $b_1$ ,  $b_2$ , and  $b_3$ , and k point paths for the calculation of the band structure are shown as purple line.



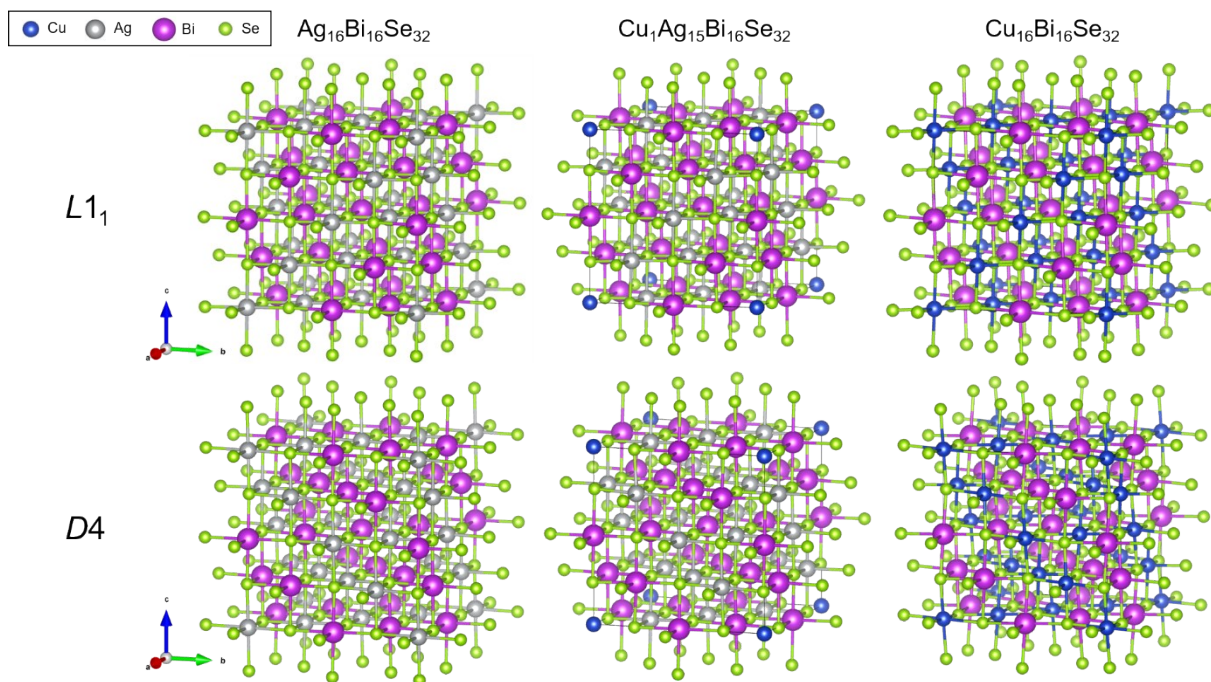

**Figure S13.** Fully optimized crystal structure of  $\text{Ag}_{16}\text{Bi}_{16}\text{Se}_{32}$  (ABS),  $\text{Cu}_1\text{Ag}_{15}\text{Bi}_{16}\text{Se}_{32}$  (CABS), and  $\text{Cu}_{16}\text{Bi}_{16}\text{Se}_{32}$  (CBS) with the  $L1_1$  (AF-II) and  $D4$  (AF-IIb) structure.

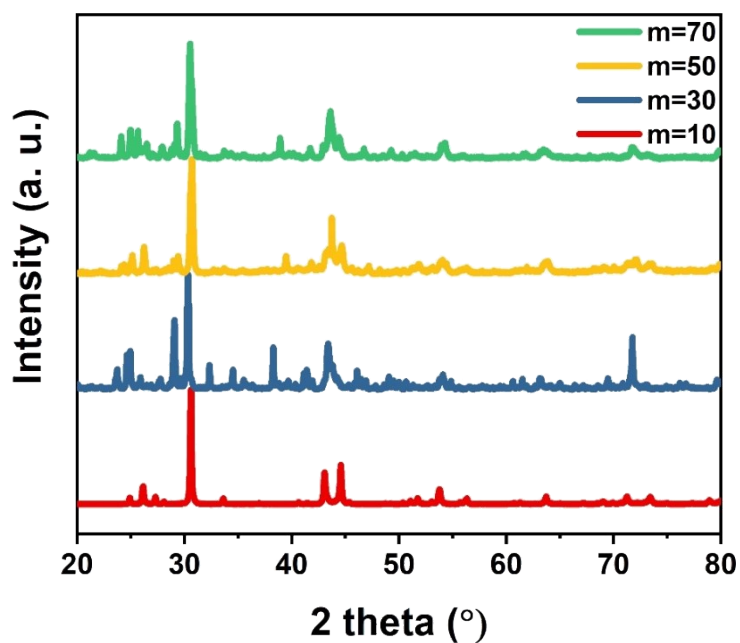

**Figure S14.** Room-temperature powder X-ray diffraction (PXRD) pattern of CABS-m ( $m=10, 30, 50,$  and  $70$ ). No single phase is obtained after  $m=30$  in the process condition of this work.



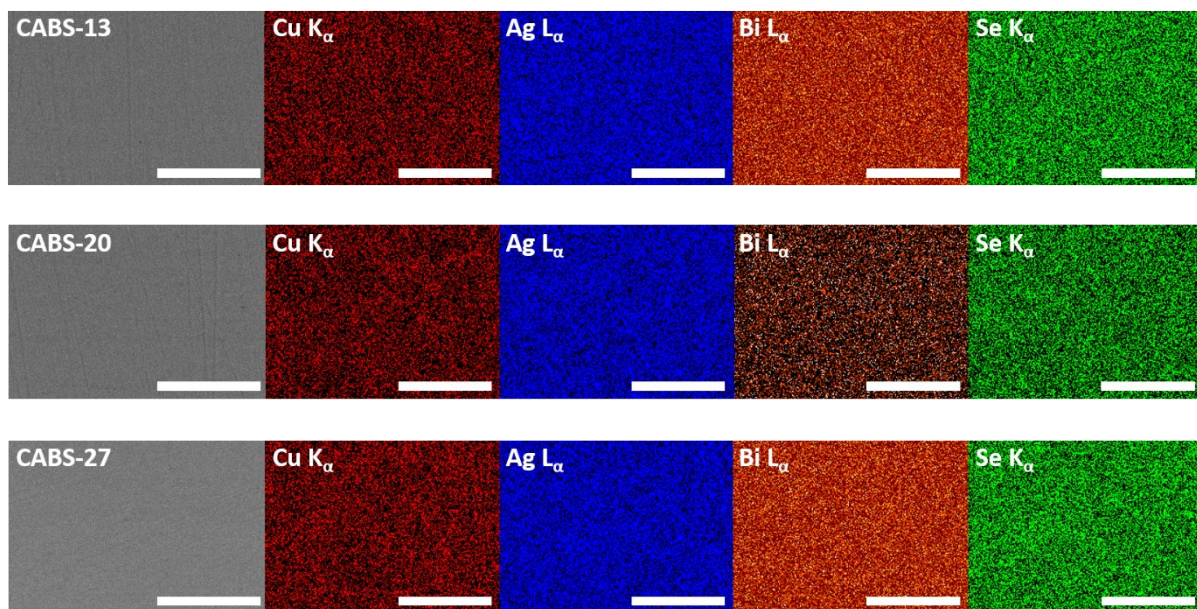

**Figure S15.** BSE-SEM images of polished surface of CABS-m with EDX elemental mapping, showing homogeneous distribution of elements within the sample. Scale bar = 50  $\mu\text{m}$ .

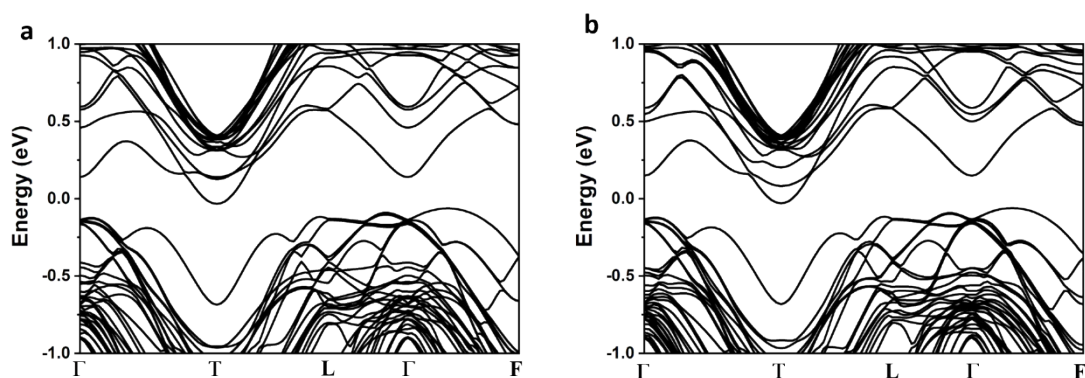

**Figure S16.** Calculated electronic band structure of  $\text{Cu}_2\text{Ag}_{14}\text{Bi}_{16}\text{Se}_{32}$  with the  $L1_1$  structure for different Cu-Cu distances. Both (a) the farthest configuration and (b) the nearest configuration shows a nesting of the conduction band at the T point. Spin-orbit interaction was included in the calculation.

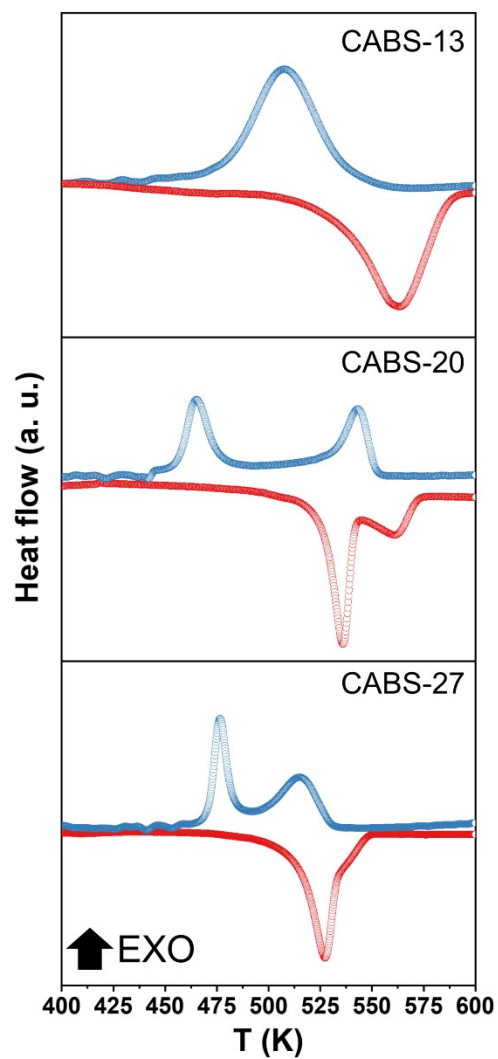

**Figure S17.** DSC experiment result of CABS alloys from 400 K to 600 K. A shift of the onset temperature of the phase transition is observed.

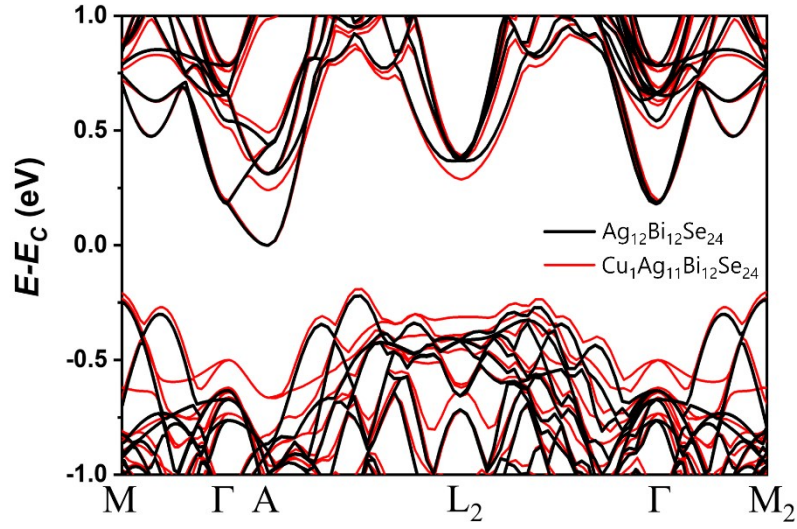

**Figure S18.** Calculated electronic structure of  $\text{Ag}_{12}\text{Bi}_{12}\text{Se}_{24}$  and  $\text{Cu}_1\text{Ag}_{11}\text{Bi}_{12}\text{Se}_{24}$  with the hexagonal structure. Spin-orbit interaction was not included in the calculation.

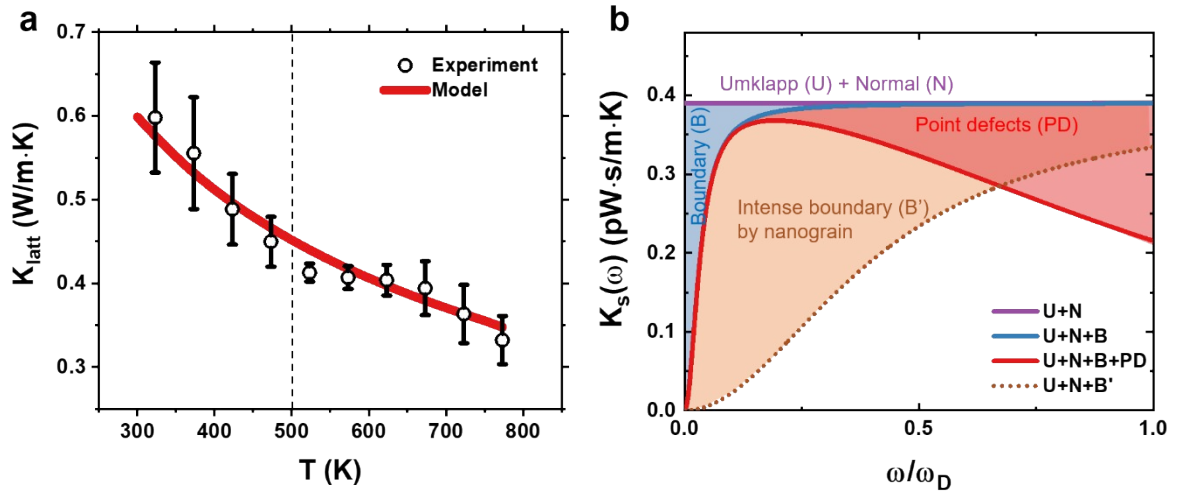

**Figure S19.** (a) The experimental lattice thermal conductivity of CABS-27 and (b) the spectral lattice thermal conductivity at 323 K. The phonon frequency was defined to the Debye frequency of ABS. Various scattering processes including Umklapp (U), normal (N), grain boundary of CABS-27 (B), and that of CABS-13 (B'), and point defects (PD) were considered.

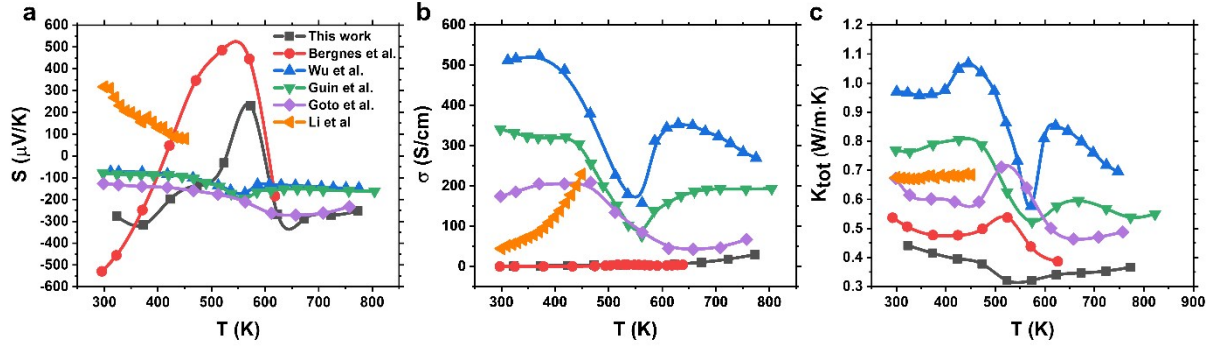

**Figure S20.** Temperature-dependent (a) Seebeck coefficient, (b) electrical conductivity, and (c) total thermal conductivity of  $\text{AgBiSe}_2$ . Reported TE properties of the pure  $\text{AgBiSe}_2$  is plotted together for the comparison.

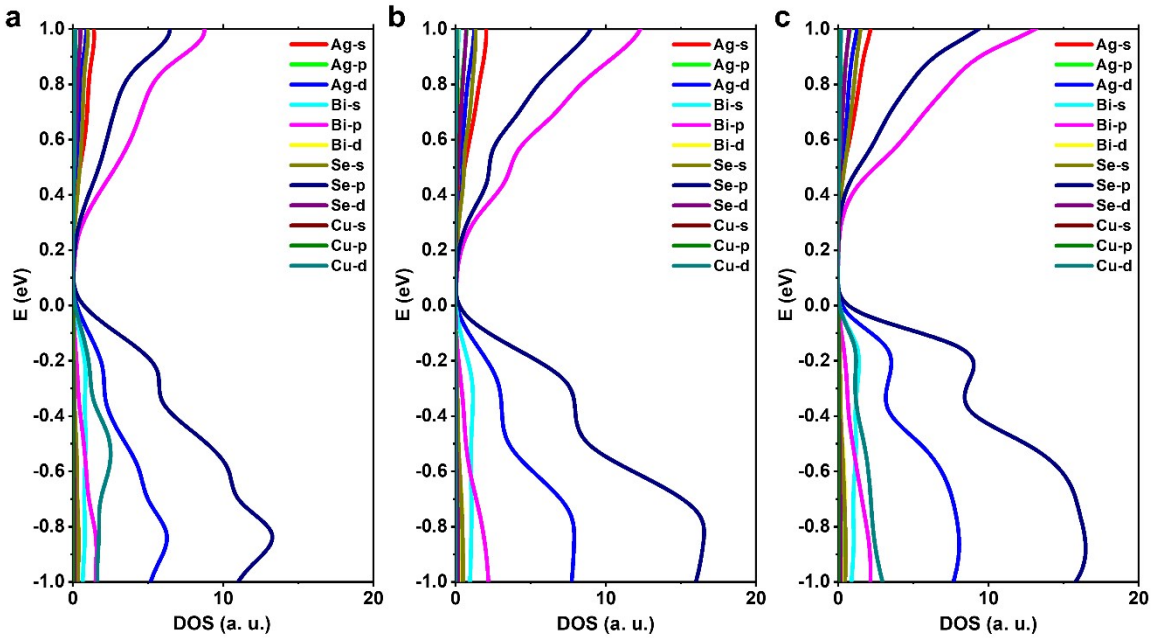

**Figure S21.** Atom-projected density of states of  $\text{Cu}_1\text{Ag}_{15}\text{Bi}_{16}\text{Se}_{32}$  with the (a) hexagonal, (b)  $L1_1$ , and (c)  $D4$  structure. Spin-orbit interaction was included in the calculation.



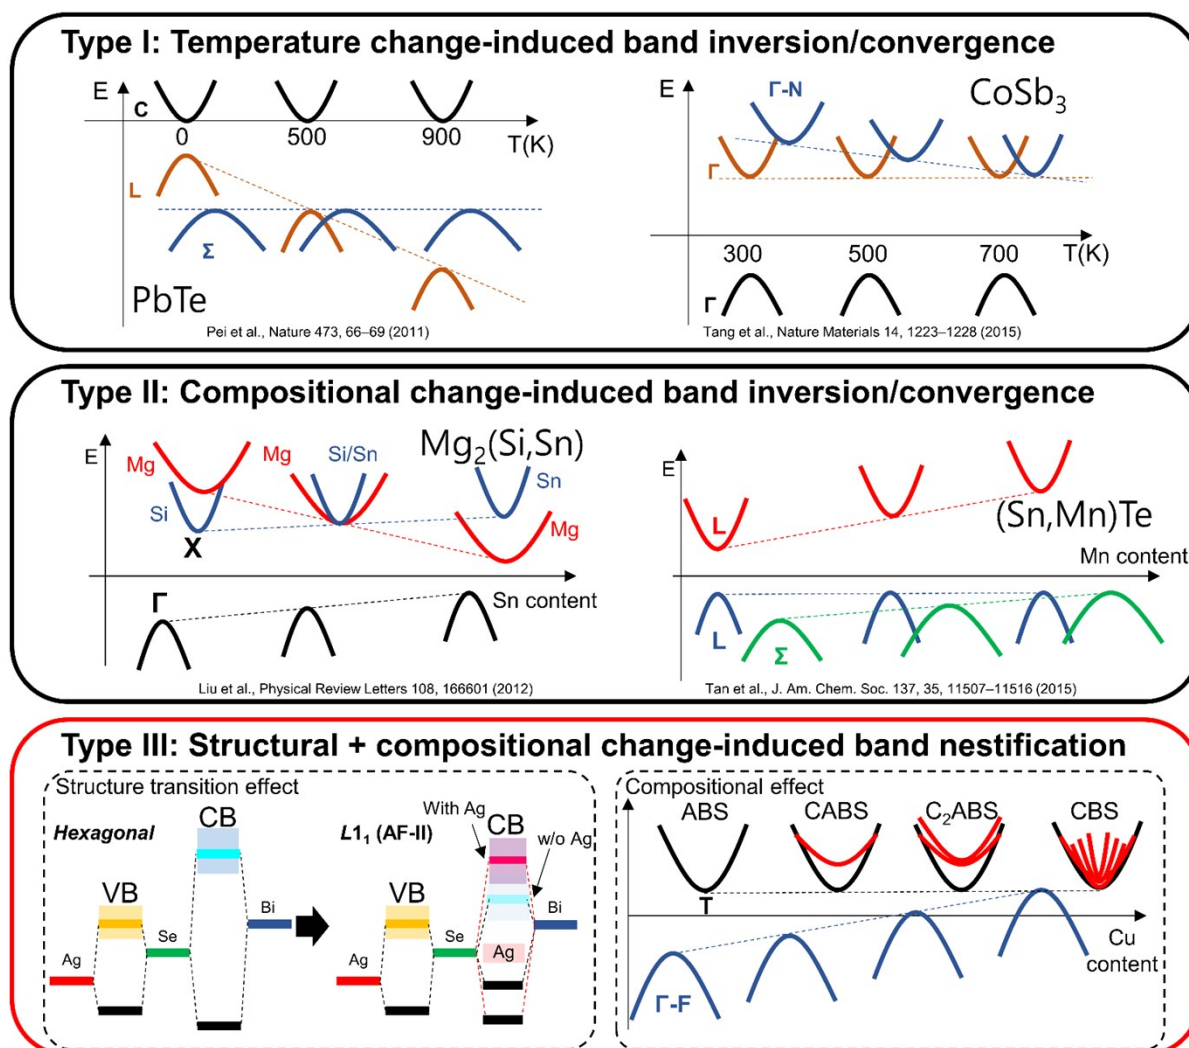

**Figure S22.** Comparison of previously reported mechanism of the band convergence (Type I, II) and the band nestification of this work (Type III).

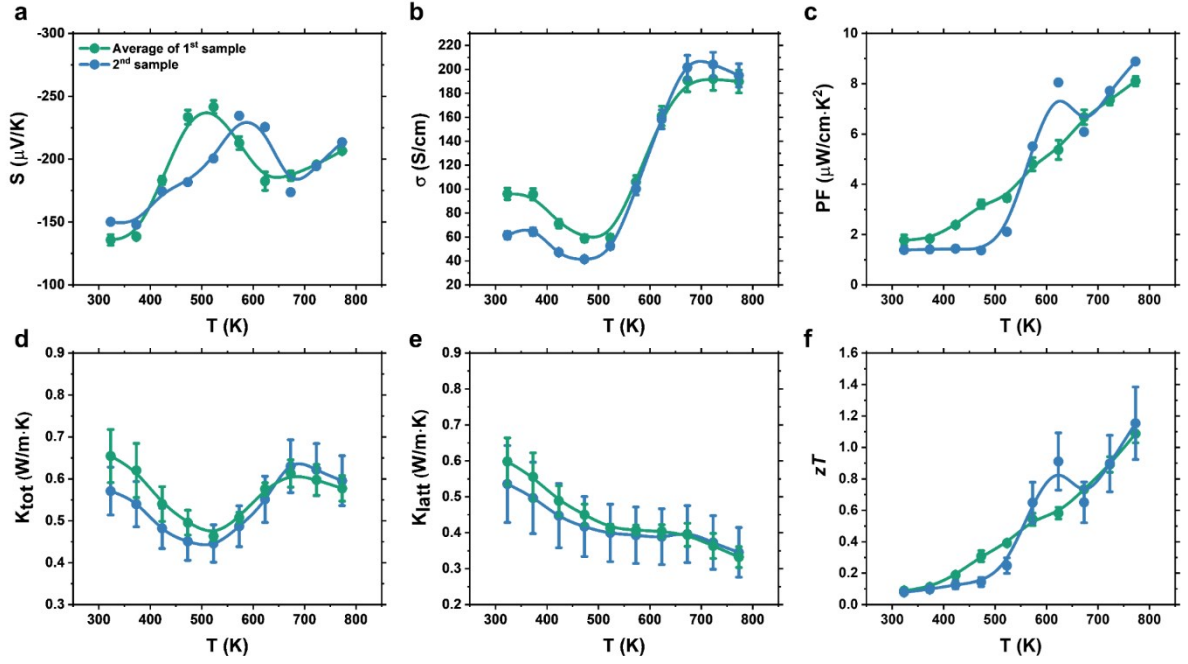

**Figure S23.** The temperature-dependent (a) Seebeck coefficient, (b) electrical conductivity, (c) power factor, (d) total thermal conductivity, (e) lattice thermal conductivity, and (f)  $zT$  values of independently prepared CABS-27. Each individual sample exhibits similar temperature dependence, especially at high temperatures.

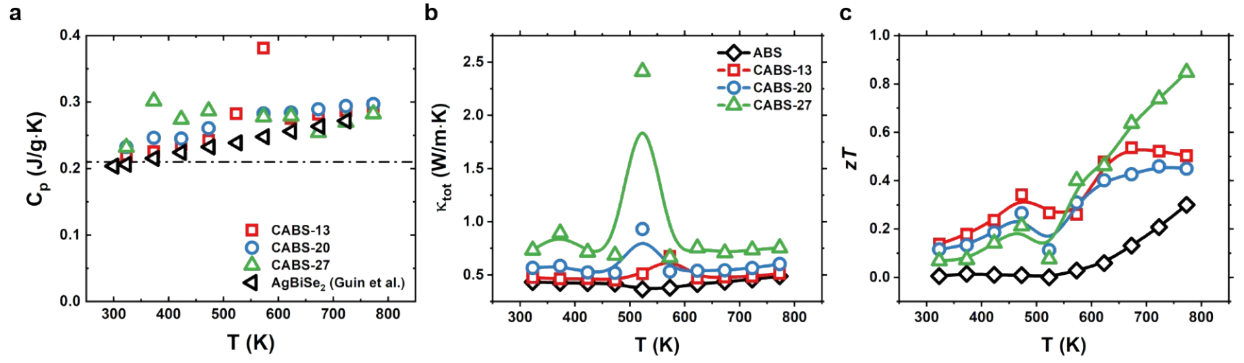

**Figure S24.** Temperature-dependent (a) specific heat capacity, (b) total thermal conductivity from measured  $C_p$ , and (c) corresponding  $zT$  values of CABS alloys.



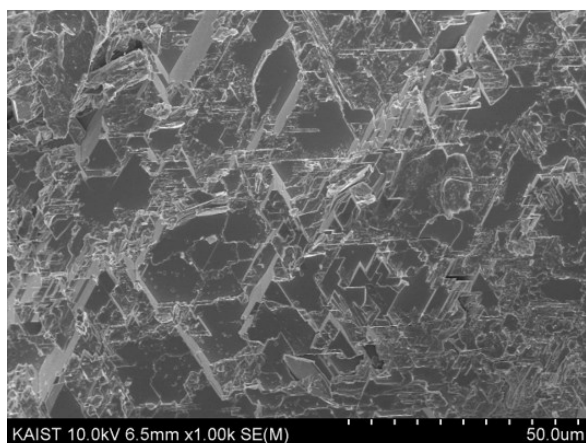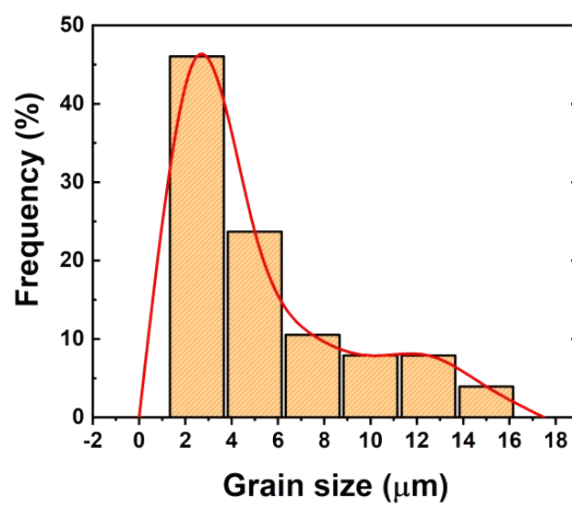

**Figure S25.** Low-magnification SEM image of the fracture surface of CABS-27 and its bimodal distribution of the grain size.

| Atom | x    | y    | z    | Atom | x        | y        | z        |
|------|------|------|------|------|----------|----------|----------|
| Ag1  | 0    | 0    | 0    | Se1  | 0.245525 | 0.245525 | 0.254475 |
| Ag2  | 0    | 0.25 | 0.25 | Se2  | 0.245525 | 0.995525 | 0.004475 |
| Ag3  | 0.25 | 0    | 0.25 | Se3  | 0.995525 | 0.245525 | 0.004475 |
| Ag4  | 0.25 | 0.25 | 0.5  | Se4  | 0.004475 | 0.004475 | 0.245525 |
| Ag5  | 0.25 | 0.75 | 0    | Se5  | 0.254475 | 0.254475 | 0.745525 |
| Ag6  | 0    | 0.5  | 0.5  | Se6  | 0.254475 | 0.004475 | 0.495525 |
| Ag7  | 0    | 0.75 | 0.75 | Se7  | 0.004475 | 0.254475 | 0.495525 |
| Ag8  | 0.25 | 0.5  | 0.75 | Se8  | 0.995525 | 0.995525 | 0.754475 |
| Ag9  | 0.75 | 0.25 | 0    | Se9  | 0.254475 | 0.754475 | 0.245525 |
| Ag10 | 0.5  | 0    | 0.5  | Se10 | 0.254475 | 0.504475 | 0.995525 |
| Ag11 | 0.5  | 0.25 | 0.75 | Se11 | 0.004475 | 0.754475 | 0.995525 |
| Ag12 | 0.75 | 0    | 0.75 | Se12 | 0.995525 | 0.495525 | 0.254475 |
| Ag13 | 0.5  | 0.5  | 0    | Se13 | 0.245525 | 0.745525 | 0.754475 |
| Ag14 | 0.5  | 0.75 | 0.25 | Se14 | 0.245525 | 0.495525 | 0.504475 |
| Ag15 | 0.75 | 0.5  | 0.25 | Se15 | 0.995525 | 0.745525 | 0.504475 |
| Ag16 | 0.75 | 0.75 | 0.5  | Se16 | 0.004475 | 0.504475 | 0.745525 |
| Bi1  | 0.25 | 0.25 | 0    | Se17 | 0.754475 | 0.254475 | 0.245525 |
| Bi2  | 0    | 0    | 0.5  | Se18 | 0.754475 | 0.004475 | 0.995525 |
| Bi3  | 0    | 0.25 | 0.75 | Se19 | 0.504475 | 0.254475 | 0.995525 |
| Bi4  | 0.25 | 0    | 0.75 | Se20 | 0.495525 | 0.995525 | 0.254475 |
| Bi5  | 0    | 0.5  | 0    | Se21 | 0.745525 | 0.245525 | 0.754475 |
| Bi6  | 0    | 0.75 | 0.25 | Se22 | 0.745525 | 0.995525 | 0.504475 |
| Bi7  | 0.25 | 0.5  | 0.25 | Se23 | 0.495525 | 0.245525 | 0.504475 |
| Bi8  | 0.25 | 0.75 | 0.5  | Se24 | 0.504475 | 0.004475 | 0.745525 |
| Bi9  | 0.5  | 0    | 0    | Se25 | 0.745525 | 0.745525 | 0.254475 |
| Bi10 | 0.5  | 0.25 | 0.25 | Se26 | 0.745525 | 0.495525 | 0.004475 |
| Bi11 | 0.75 | 0    | 0.25 | Se27 | 0.495525 | 0.745525 | 0.004475 |
| Bi12 | 0.75 | 0.25 | 0.5  | Se28 | 0.504475 | 0.504475 | 0.245525 |
| Bi13 | 0.75 | 0.75 | 0    | Se29 | 0.754475 | 0.754475 | 0.745525 |
| Bi14 | 0.5  | 0.5  | 0.5  | Se30 | 0.754475 | 0.504475 | 0.495525 |
| Bi15 | 0.5  | 0.75 | 0.75 | Se31 | 0.504475 | 0.754475 | 0.495525 |
| Bi16 | 0.75 | 0.5  | 0.75 | Se32 | 0.495525 | 0.495525 | 0.754475 |

**Table S1.** Relaxed atomic position of the  $\text{Ag}_{16}\text{Bi}_{16}\text{Se}_{32}$  (ABS) supercell with AF-II ( $L1_1$ ) structure.

| Atom | x    | y    | z    | Atom | x        | y        | z        |
|------|------|------|------|------|----------|----------|----------|
| Ag1  | 0    | 0    | 0    | Se1  | 0.254102 | 0.245898 | 0.254102 |
| Ag2  | 0.25 | 0    | 0.25 | Se2  | 0.245898 | 0.995898 | 0.004102 |
| Ag3  | 0    | 0.25 | 0.75 | Se3  | 0.995898 | 0.245898 | 0.995898 |
| Ag4  | 0.25 | 0.25 | 0.5  | Se4  | 0.004102 | 0.995898 | 0.245898 |
| Ag5  | 0    | 0.75 | 0.25 | Se5  | 0.245898 | 0.254102 | 0.745898 |
| Ag6  | 0.25 | 0.75 | 0    | Se6  | 0.254102 | 0.004102 | 0.495898 |
| Ag7  | 0    | 0.5  | 0.5  | Se7  | 0.004102 | 0.254102 | 0.504102 |
| Ag8  | 0.25 | 0.5  | 0.75 | Se8  | 0.995898 | 0.004102 | 0.754102 |
| Ag9  | 0.5  | 0.25 | 0.25 | Se9  | 0.245898 | 0.754102 | 0.245898 |
| Ag10 | 0.75 | 0.25 | 0    | Se10 | 0.254102 | 0.504102 | 0.995898 |
| Ag11 | 0.5  | 0    | 0.5  | Se11 | 0.004102 | 0.754102 | 0.004102 |
| Ag12 | 0.75 | 0    | 0.75 | Se12 | 0.995898 | 0.504102 | 0.254102 |
| Ag13 | 0.5  | 0.5  | 0    | Se13 | 0.254102 | 0.745898 | 0.754102 |
| Ag14 | 0.75 | 0.5  | 0.25 | Se14 | 0.245898 | 0.495898 | 0.504102 |
| Ag15 | 0.5  | 0.75 | 0.75 | Se15 | 0.995898 | 0.745898 | 0.495898 |
| Ag16 | 0.75 | 0.75 | 0.5  | Se16 | 0.004102 | 0.495898 | 0.745898 |
| Bi1  | 0    | 0.25 | 0.25 | Se17 | 0.745898 | 0.254102 | 0.245898 |
| Bi2  | 0.25 | 0.25 | 0    | Se18 | 0.754102 | 0.004102 | 0.995898 |
| Bi3  | 0    | 0    | 0.5  | Se19 | 0.504102 | 0.254102 | 0.004102 |
| Bi4  | 0.25 | 0    | 0.75 | Se20 | 0.495898 | 0.004102 | 0.254102 |
| Bi5  | 0    | 0.5  | 0    | Se21 | 0.754102 | 0.245898 | 0.754102 |
| Bi6  | 0.25 | 0.5  | 0.25 | Se22 | 0.745898 | 0.995898 | 0.504102 |
| Bi7  | 0    | 0.75 | 0.75 | Se23 | 0.495898 | 0.245898 | 0.495898 |
| Bi8  | 0.25 | 0.75 | 0.5  | Se24 | 0.504102 | 0.995898 | 0.745898 |
| Bi9  | 0.5  | 0    | 0    | Se25 | 0.754102 | 0.745898 | 0.254102 |
| Bi10 | 0.75 | 0    | 0.25 | Se26 | 0.745898 | 0.495898 | 0.004102 |
| Bi11 | 0.5  | 0.25 | 0.75 | Se27 | 0.495898 | 0.745898 | 0.995898 |
| Bi12 | 0.75 | 0.25 | 0.5  | Se28 | 0.504102 | 0.495898 | 0.245898 |
| Bi13 | 0.5  | 0.75 | 0.25 | Se29 | 0.745898 | 0.754102 | 0.745898 |
| Bi14 | 0.75 | 0.75 | 0    | Se30 | 0.754102 | 0.504102 | 0.495898 |
| Bi15 | 0.5  | 0.5  | 0.5  | Se31 | 0.504102 | 0.754102 | 0.504102 |
| Bi16 | 0.75 | 0.5  | 0.75 | Se32 | 0.495898 | 0.504102 | 0.754102 |

**Table S2.** Relaxed atomic position of the  $\text{Ag}_{16}\text{Bi}_{16}\text{Se}_{32}$  (ABS) supercell with AF-IIb ( $D_4$ ) structure.

| Atom | x           | y           | z           | Atom | x           | y           | z           |
|------|-------------|-------------|-------------|------|-------------|-------------|-------------|
| Ag1  | 0           | 0.249803402 | 0.249803402 | Se1  | 0.245170298 | 0.245170298 | 0.254814502 |
| Ag2  | 0.249803402 | 0           | 0.249803402 | Se2  | 0.237280634 | 0.995453436 | 0.004546564 |
| Ag3  | 0.249997538 | 0.249997538 | 0.500015515 | Se3  | 0.995453436 | 0.237280634 | 0.004546564 |
| Ag4  | 0.249803402 | 0.750196598 | 0           | Se4  | 0.004546564 | 0.004546564 | 0.237280634 |
| Ag5  | 0           | 0.5         | 0.5         | Se5  | 0.254854092 | 0.254854092 | 0.745145908 |
| Ag6  | 0           | 0.750196598 | 0.750196598 | Se6  | 0.25450097  | 0.004789187 | 0.495144041 |
| Ag7  | 0.249997538 | 0.499984485 | 0.750002462 | Se7  | 0.004789187 | 0.25450097  | 0.495144041 |
| Ag8  | 0.750196598 | 0.249803402 | 0           | Se8  | 0.995453436 | 0.995453436 | 0.762719366 |
| Ag9  | 0.5         | 0           | 0.5         | Se9  | 0.254814502 | 0.754829702 | 0.245170298 |
| Ag10 | 0.499984485 | 0.249997538 | 0.750002462 | Se10 | 0.25450097  | 0.504855959 | 0.995210813 |
| Ag11 | 0.750196598 | 0           | 0.750196598 | Se11 | 0.004546564 | 0.762719366 | 0.995453436 |
| Ag12 | 0.5         | 0.5         | 0           | Se12 | 0.995210813 | 0.495144041 | 0.25450097  |
| Ag13 | 0.500015515 | 0.750002462 | 0.249997538 | Se13 | 0.245170298 | 0.745185498 | 0.754829702 |
| Ag14 | 0.750002462 | 0.500015515 | 0.249997538 | Se14 | 0.245163286 | 0.495204149 | 0.504795851 |
| Ag15 | 0.750002462 | 0.750002462 | 0.499984485 | Se15 | 0.995210813 | 0.74549903  | 0.504855959 |
| Cu1  | 0           | 0           | 0           | Se16 | 0.004789187 | 0.504855959 | 0.74549903  |
| Bi1  | 0.24933419  | 0.24933419  | -4.9023E-07 | Se17 | 0.754829702 | 0.254814502 | 0.245170298 |
| Bi2  | 0           | 0           | 0.5         | Se18 | 0.762719366 | 0.004546564 | 0.995453436 |
| Bi3  | 4.9023E-07  | 0.24933419  | 0.75066581  | Se19 | 0.504855959 | 0.25450097  | 0.995210813 |
| Bi4  | 0.24933419  | 4.9023E-07  | 0.75066581  | Se20 | 0.495144041 | 0.995210813 | 0.25450097  |
| Bi5  | 0           | 0.5         | 0           | Se21 | 0.745185498 | 0.245170298 | 0.754829702 |
| Bi6  | -4.9023E-07 | 0.75066581  | 0.24933419  | Se22 | 0.74549903  | 0.995210813 | 0.504855959 |
| Bi7  | 0.249977315 | 0.5         | 0.249977315 | Se23 | 0.495204149 | 0.245163286 | 0.504795851 |
| Bi8  | 0.249977315 | 0.750022685 | 0.5         | Se24 | 0.504855959 | 0.004789187 | 0.74549903  |
| Bi9  | 0.5         | 0           | 0           | Se25 | 0.745145908 | 0.745145908 | 0.254854092 |
| Bi10 | 0.5         | 0.249977315 | 0.249977315 | Se26 | 0.74549903  | 0.495144041 | 0.004789187 |
| Bi11 | 0.75066581  | -4.9023E-07 | 0.24933419  | Se27 | 0.495144041 | 0.74549903  | 0.004789187 |
| Bi12 | 0.750022685 | 0.249977315 | 0.5         | Se28 | 0.504795851 | 0.504795851 | 0.245163286 |
| Bi13 | 0.75066581  | 0.75066581  | 4.9023E-07  | Se29 | 0.754829702 | 0.754829702 | 0.745185498 |
| Bi14 | 0.5         | 0.5         | 0.5         | Se30 | 0.754836714 | 0.504795851 | 0.495204149 |
| Bi15 | 0.5         | 0.750022685 | 0.750022685 | Se31 | 0.504795851 | 0.754836714 | 0.495204149 |
| Bi16 | 0.750022685 | 0.5         | 0.750022685 | Se32 | 0.495204149 | 0.495204149 | 0.754836714 |

**Table S3.** Relaxed atomic position of the Cu<sub>1</sub>Ag<sub>15</sub>Bi<sub>16</sub>Se<sub>32</sub> (CABS) supercell with AF-II (*L1*<sub>1</sub>) structure.

| Atom | x        | y        | z        | Atom | x        | y        | z        |
|------|----------|----------|----------|------|----------|----------|----------|
| Ag1  | 0.249757 | 2.34E-06 | 0.249757 | Se1  | 0.254379 | 0.245589 | 0.254379 |
| Ag2  | 2.34E-06 | 0.249757 | 0.750243 | Se2  | 0.23776  | 0.995869 | 0.004131 |
| Ag3  | 0.249999 | 0.249999 | 0.5      | Se3  | 0.995869 | 0.23776  | 0.995869 |
| Ag4  | -2.3E-06 | 0.750243 | 0.249757 | Se4  | 0.004131 | 0.995869 | 0.23776  |
| Ag5  | 0.249757 | 0.750243 | -2.3E-06 | Se5  | 0.245589 | 0.254379 | 0.745621 |
| Ag6  | 0        | 0.5      | 0.5      | Se6  | 0.254003 | 0.004343 | 0.495565 |
| Ag7  | 0.249999 | 0.5      | 0.750001 | Se7  | 0.004343 | 0.254003 | 0.504435 |
| Ag8  | 0.5      | 0.249999 | 0.249999 | Se8  | 0.995869 | 0.004131 | 0.76224  |
| Ag9  | 0.750243 | 0.249757 | 2.34E-06 | Se9  | 0.245653 | 0.754347 | 0.245653 |
| Ag10 | 0.5      | 0        | 0.5      | Se10 | 0.254003 | 0.504435 | 0.995657 |
| Ag11 | 0.750243 | -2.3E-06 | 0.750243 | Se11 | 0.004131 | 0.76224  | 0.004131 |
| Ag12 | 0.5      | 0.5      | 0        | Se12 | 0.995657 | 0.504435 | 0.254003 |
| Ag13 | 0.750001 | 0.5      | 0.249999 | Se13 | 0.254379 | 0.745621 | 0.754411 |
| Ag14 | 0.5      | 0.750001 | 0.750001 | Se14 | 0.245606 | 0.495644 | 0.504356 |
| Ag15 | 0.750001 | 0.750001 | 0.5      | Se15 | 0.995657 | 0.745997 | 0.495565 |
| Cu1  | 0        | 0        | 0        | Se16 | 0.004343 | 0.495565 | 0.745997 |
| Bi1  | 0        | 0.24927  | 0.24927  | Se17 | 0.745621 | 0.254379 | 0.245589 |
| Bi2  | 0.24927  | 0.24927  | 0        | Se18 | 0.76224  | 0.004131 | 0.995869 |
| Bi3  | 0        | 0        | 0.5      | Se19 | 0.504435 | 0.254003 | 0.004343 |
| Bi4  | 0.24927  | 0        | 0.75073  | Se20 | 0.495565 | 0.004343 | 0.254003 |
| Bi5  | 0        | 0.5      | 0        | Se21 | 0.754347 | 0.245653 | 0.754347 |
| Bi6  | 0.249975 | 0.499988 | 0.249975 | Se22 | 0.745997 | 0.995657 | 0.504435 |
| Bi7  | 0        | 0.75073  | 0.75073  | Se23 | 0.495644 | 0.245606 | 0.495644 |
| Bi8  | 0.249975 | 0.750025 | 0.500012 | Se24 | 0.504435 | 0.995657 | 0.745997 |
| Bi9  | 0.5      | 0        | 0        | Se25 | 0.754411 | 0.745621 | 0.254379 |
| Bi10 | 0.75073  | 0        | 0.24927  | Se26 | 0.745997 | 0.495565 | 0.004343 |
| Bi11 | 0.499988 | 0.249975 | 0.750025 | Se27 | 0.495565 | 0.745997 | 0.995657 |
| Bi12 | 0.750025 | 0.249975 | 0.499988 | Se28 | 0.504356 | 0.495644 | 0.245606 |
| Bi13 | 0.500012 | 0.750025 | 0.249975 | Se29 | 0.745621 | 0.754411 | 0.745621 |
| Bi14 | 0.75073  | 0.75073  | 0        | Se30 | 0.754394 | 0.504356 | 0.495644 |
| Bi15 | 0.5      | 0.5      | 0.5      | Se31 | 0.504356 | 0.754394 | 0.504356 |
| Bi16 | 0.750025 | 0.500012 | 0.750025 | Se32 | 0.495644 | 0.504356 | 0.754394 |

**Table S4.** Relaxed atomic position of the Cu<sub>1</sub>Ag<sub>15</sub>Bi<sub>16</sub>Se<sub>32</sub> (CABS) supercell with AF-IIb (*D4*) structure.

| Atom | x    | y    | z    | Atom | x        | y        | z        |
|------|------|------|------|------|----------|----------|----------|
| Cu1  | 0    | 0    | 0    | Se1  | 0.237231 | 0.237231 | 0.262769 |
| Cu2  | 0    | 0.25 | 0.25 | Se2  | 0.237231 | 0.987231 | 0.012769 |
| Cu3  | 0.25 | 0    | 0.25 | Se3  | 0.987231 | 0.237231 | 0.012769 |
| Cu4  | 0.25 | 0.25 | 0.5  | Se4  | 0.012769 | 0.012769 | 0.237231 |
| Cu5  | 0.25 | 0.75 | 0    | Se5  | 0.262769 | 0.262769 | 0.737231 |
| Cu6  | 0    | 0.5  | 0.5  | Se6  | 0.262769 | 0.012769 | 0.487231 |
| Cu7  | 0    | 0.75 | 0.75 | Se7  | 0.012769 | 0.262769 | 0.487231 |
| Cu8  | 0.25 | 0.5  | 0.75 | Se8  | 0.987231 | 0.987231 | 0.762769 |
| Cu9  | 0.75 | 0.25 | 0    | Se9  | 0.262769 | 0.762769 | 0.237231 |
| Cu10 | 0.5  | 0    | 0.5  | Se10 | 0.262769 | 0.512769 | 0.987231 |
| Cu11 | 0.5  | 0.25 | 0.75 | Se11 | 0.012769 | 0.762769 | 0.987231 |
| Cu12 | 0.75 | 0    | 0.75 | Se12 | 0.987231 | 0.487231 | 0.262769 |
| Cu13 | 0.5  | 0.5  | 0    | Se13 | 0.237231 | 0.737231 | 0.762769 |
| Cu14 | 0.5  | 0.75 | 0.25 | Se14 | 0.237231 | 0.487231 | 0.512769 |
| Cu15 | 0.75 | 0.5  | 0.25 | Se15 | 0.987231 | 0.737231 | 0.512769 |
| Cu16 | 0.75 | 0.75 | 0.5  | Se16 | 0.012769 | 0.512769 | 0.737231 |
| Bi1  | 0.25 | 0.25 | 0    | Se17 | 0.762769 | 0.262769 | 0.237231 |
| Bi2  | 0    | 0    | 0.5  | Se18 | 0.762769 | 0.012769 | 0.987231 |
| Bi3  | 0    | 0.25 | 0.75 | Se19 | 0.512769 | 0.262769 | 0.987231 |
| Bi4  | 0.25 | 0    | 0.75 | Se20 | 0.487231 | 0.987231 | 0.262769 |
| Bi5  | 0    | 0.5  | 0    | Se21 | 0.737231 | 0.237231 | 0.762769 |
| Bi6  | 0    | 0.75 | 0.25 | Se22 | 0.737231 | 0.987231 | 0.512769 |
| Bi7  | 0.25 | 0.5  | 0.25 | Se23 | 0.487231 | 0.237231 | 0.512769 |
| Bi8  | 0.25 | 0.75 | 0.5  | Se24 | 0.512769 | 0.012769 | 0.737231 |
| Bi9  | 0.5  | 0    | 0    | Se25 | 0.737231 | 0.737231 | 0.262769 |
| Bi10 | 0.5  | 0.25 | 0.25 | Se26 | 0.737231 | 0.487231 | 0.012769 |
| Bi11 | 0.75 | 0    | 0.25 | Se27 | 0.487231 | 0.737231 | 0.012769 |
| Bi12 | 0.75 | 0.25 | 0.5  | Se28 | 0.512769 | 0.512769 | 0.237231 |
| Bi13 | 0.75 | 0.75 | 0    | Se29 | 0.762769 | 0.762769 | 0.737231 |
| Bi14 | 0.5  | 0.5  | 0.5  | Se30 | 0.762769 | 0.512769 | 0.487231 |
| Bi15 | 0.5  | 0.75 | 0.75 | Se31 | 0.512769 | 0.762769 | 0.487231 |
| Bi16 | 0.75 | 0.5  | 0.75 | Se32 | 0.487231 | 0.487231 | 0.762769 |

**Table S5.** Relaxed atomic position of the Cu<sub>16</sub>Bi<sub>16</sub>Se<sub>32</sub> (CBS) supercell with AF-II (*L*<sub>1</sub>) structure.



| Atom | x    | y    | z    | Atom | x       | y       | z       |
|------|------|------|------|------|---------|---------|---------|
| Cu1  | 0    | 0    | 0    | Se1  | 0.26296 | 0.23704 | 0.26296 |
| Cu2  | 0.25 | 0    | 0.25 | Se2  | 0.23704 | 0.98704 | 0.01296 |
| Cu3  | 0    | 0.25 | 0.75 | Se3  | 0.98704 | 0.23704 | 0.98704 |
| Cu4  | 0.25 | 0.25 | 0.5  | Se4  | 0.01296 | 0.98704 | 0.23704 |
| Cu5  | 0    | 0.75 | 0.25 | Se5  | 0.23704 | 0.26296 | 0.73704 |
| Cu6  | 0.25 | 0.75 | 0    | Se6  | 0.26296 | 0.01296 | 0.48704 |
| Cu7  | 0    | 0.5  | 0.5  | Se7  | 0.01296 | 0.26296 | 0.51296 |
| Cu8  | 0.25 | 0.5  | 0.75 | Se8  | 0.98704 | 0.01296 | 0.76296 |
| Cu9  | 0.5  | 0.25 | 0.25 | Se9  | 0.23704 | 0.76296 | 0.23704 |
| Cu10 | 0.75 | 0.25 | 0    | Se10 | 0.26296 | 0.51296 | 0.98704 |
| Cu11 | 0.5  | 0    | 0.5  | Se11 | 0.01296 | 0.76296 | 0.01296 |
| Cu12 | 0.75 | 0    | 0.75 | Se12 | 0.98704 | 0.51296 | 0.26296 |
| Cu13 | 0.5  | 0.5  | 0    | Se13 | 0.26296 | 0.73704 | 0.76296 |
| Cu14 | 0.75 | 0.5  | 0.25 | Se14 | 0.23704 | 0.48704 | 0.51296 |
| Cu15 | 0.5  | 0.75 | 0.75 | Se15 | 0.98704 | 0.73704 | 0.48704 |
| Cu16 | 0.75 | 0.75 | 0.5  | Se16 | 0.01296 | 0.48704 | 0.73704 |
| Bi1  | 0    | 0.25 | 0.25 | Se17 | 0.73704 | 0.26296 | 0.23704 |
| Bi2  | 0.25 | 0.25 | 0    | Se18 | 0.76296 | 0.01296 | 0.98704 |
| Bi3  | 0    | 0    | 0.5  | Se19 | 0.51296 | 0.26296 | 0.01296 |
| Bi4  | 0.25 | 0    | 0.75 | Se20 | 0.48704 | 0.01296 | 0.26296 |
| Bi5  | 0    | 0.5  | 0    | Se21 | 0.76296 | 0.23704 | 0.76296 |
| Bi6  | 0.25 | 0.5  | 0.25 | Se22 | 0.73704 | 0.98704 | 0.51296 |
| Bi7  | 0    | 0.75 | 0.75 | Se23 | 0.48704 | 0.23704 | 0.48704 |
| Bi8  | 0.25 | 0.75 | 0.5  | Se24 | 0.51296 | 0.98704 | 0.73704 |
| Bi9  | 0.5  | 0    | 0    | Se25 | 0.76296 | 0.73704 | 0.26296 |
| Bi10 | 0.75 | 0    | 0.25 | Se26 | 0.73704 | 0.48704 | 0.01296 |
| Bi11 | 0.5  | 0.25 | 0.75 | Se27 | 0.48704 | 0.73704 | 0.98704 |
| Bi12 | 0.75 | 0.25 | 0.5  | Se28 | 0.51296 | 0.48704 | 0.23704 |
| Bi13 | 0.5  | 0.75 | 0.25 | Se29 | 0.73704 | 0.76296 | 0.73704 |
| Bi14 | 0.75 | 0.75 | 0    | Se30 | 0.76296 | 0.51296 | 0.48704 |
| Bi15 | 0.5  | 0.5  | 0.5  | Se31 | 0.51296 | 0.76296 | 0.51296 |
| Bi16 | 0.75 | 0.5  | 0.75 | Se32 | 0.48704 | 0.51296 | 0.76296 |

**Table S6.** Relaxed atomic position of the Cu<sub>16</sub>Bi<sub>16</sub>Se<sub>32</sub> (CBS) supercell with AF-IIb (*D*<sub>4</sub>) structure.

## Relationship between the phase transition and Cu content in CABS alloys

As observed in the transport properties, Cu content significantly affects the transition temperature of CABS alloys. Hence, to study on the phase transition behavior, we conducted DSC experiment for CABS alloys (Figure S17). The main observation is that the onset transition temperature from rhombohedral to cubic phase linearly decreases with following relationship:

$$T_{R \rightarrow C} = 533.9 - 0.7429 * m \text{ (K)}$$

where m denotes the atomic percent of Cu substituting Ag sites. Similar observations were made to other ABS-related materials when an isovalent element was alloyed in the matrix, while its physical origin is not fully understood (Goto et al., Dalton Trans., 2018, 47, 2575-2580; Bernges et al., Inorg. Chem. 2019, 58, 14, 9236–9245; Mitra et al., Cryst. Res. Technol. 52, No. 6, 1700075 (2017)).

Interestingly, the transition peak splits into two in CABS-20 with one peak at lower temperature, and CABS-27 has a broad shoulder in its peak. **This result should be mainly attributed to the effect of the grain size of CABS alloys.** It was reported that a material with small grains tends to have a broad transition peak when it experiences the phase transition (Mao et al., Journal of the European Ceramic Society 34, 2933–2939 (2014)). Also, in organic-inorganic halide perovskite, the suppression of the phase transition in small grain samples occurs, shifting the phase transition temperature to higher value (Stavrakas et al., Adv. Energy Mater. 2019, 9, 1901883). The main reason for the broad and suppressed phase transition is that **small grains are not capable of rearrange their crystal structure as easily as large grains** due to mechanical constrain effect of grain boundaries.

As observed in the SEM image of the fracture surface of CABS-13 (Figure S2), the average grain size is approximately 200 nm, while CABS-27 has the average grain size of approximately 15  $\mu\text{m}$ . Therefore, as Cu concentration increases, the constrain effect of the grain would be smaller, making grains easier to experience the phase transition at lower temperature. Based on above discussion, our conclusion on DSC experiment is as follows:

- i) The broad and uniform transition peak at the high temperature is due to a narrow grain size distribution of CABS-13 with small grain sizes
- ii) Between two transition peaks of CABS-20, the transition peak emerges at lower temperature because large grains in the sample experiences weaker constrain effect. The second transition peak shows similar transition temperature, implying that nano-grains still exist in the sample.
- iii) The major transition peak is merged with a minor peak originating from the small grain. Because of the increase of the average grain size, small grains are not small as that of CABS-13 or CABS-20. Therefore, the transition temperature is similar to that of large grains, remaining a large shoulder due to the broadness of the peak.

### Calculation of the theoretical lattice thermal conductivity

We calculated the theoretical lattice thermal conductivity by

$$\kappa_{latt} = \frac{k_B}{2\pi^2 v} \left( \frac{k_B T}{\hbar} \right)^3 \int_0^{\frac{\theta_D}{T}} \tau(z) \frac{z^4 \exp(-z)}{[\exp(z) - 1]^2} dz$$

where  $v$  is the average sound velocity and  $\theta_D$  is Debye temperature of AgBiSe<sub>2</sub>. For determination of relaxation time, Umklapp process, normal process, grain boundary, and point defects are considered in the calculation. The relaxation time of each process is given as follows:

$$\tau_U^{-1} + \tau_N^{-1} = \beta \frac{2}{(6\pi^2)^{1/3}} \frac{k_B V^{1/3} \gamma^2 \omega^2 T}{\bar{M} v^3} \quad (\text{Umklapp and normal process})$$

$$\tau_{PD}^{-1} = \frac{\bar{V} \omega^4}{4\pi v^3} \Gamma \quad (\text{Point defects})$$

$$\tau_B^{-1} = \frac{v}{d} \quad (\text{Grain boundary})$$

The total relaxation time is given by Matthiessen's rule as:  $\tau^{-1} = \tau_U^{-1} + \tau_N^{-1} + \tau_B^{-1} + \tau_{PD}^{-1}$ . Elastic properties were adopted from the work of Böcher et al. (Dalton Trans., 2017, 46, 3906-3914). The scattering parameter for point defect ( $\Gamma$ ) is calculated according to the previously reported method (Koh et al., Applied Physics Letters 94, 153101). The model predicts the experimental lattice thermal conductivity well with negligible deviation. A small difference between the model and the experiment is due to additional scattering during the phase transition, which causes critical scattering and phase boundary scattering.

To better understand the effect of each scattering process on phonon transport, we also estimated the spectral lattice thermal conductivity as a function of phonon frequency. one can easily notice that the boundary scattering (B) of CABS-27 is only limited to the low-frequency phonon due to large average grain size. In CABS-27, it is the point defects scattering which effectively suppresses high frequency phonons. However, if we decrease the size of grain to ~200 nm, which is the average grain size of CABS-13, the boundary scattering of CABS-13 (B') can scatter phonons having frequency from zero to Debye frequency. This calculation result demonstrates that **the rise of the lattice thermal conductivity near room temperature is reasonable, considering a significant larger grain size of CABS-27 than that of CABS-13.**

| Symbols    | Description                                      | Value                              |
|------------|--------------------------------------------------|------------------------------------|
| $\beta$    | Integrating factor of Umklapp and Normal process | 2.3                                |
| $V$        | Average atomic volume of AgBiSe <sub>2</sub>     | $2.97 \times 10^{-28} \text{ m}^3$ |
| $\bar{M}$  | Average atomic mass of AgBiSe <sub>2</sub>       | $7.88 \times 10^{-25} \text{ kg}$  |
| $v$        | Average sound velocity                           | 1358 m/s                           |
| $\gamma$   | Grüneisen parameter                              | 1.6                                |
| $r$        | Poisson's ratio                                  | 0.265                              |
| $\theta_D$ | Debye temperature                                | 138 K                              |

**Table S7.** Parameters used to calculate the theoretical lattice thermal conductivity of CABS alloys.

### Calculation of electronic transport properties with the three-band model

To evaluate the effect of band convergence on the thermoelectric properties, electronic transport properties were calculated based on the three-band model, which is described by light conduction band (L band,  $C_L$ ), heavy conduction band (H band,  $C_H$ ), and valence band (V band,  $V$ ). The relationship between the reduced Fermi energy of band is given by the following equation:

$$\eta_H = \eta_L - \frac{\Delta}{k_B T} \quad (1)$$

$$\eta_V = -\frac{E_g}{k_B T} - \eta_L \quad (2)$$

where  $\eta_L$ ,  $\eta_H$ ,  $\eta_V$  are the reduced Fermi energy of the light conduction band, heavy conduction band, and the valence band, respectively.  $\Delta$  is the energy offset between L band and H band, and  $E_g$  is the band gap between L band and V band.

The temperature dependence of  $\Delta$  and  $E_g$  is estimated by following equation:

$$\frac{d\Delta}{dT} = a_1 \times 10^{-4} \text{ eV/K} \quad (3)$$

$$\frac{dE_g}{dT} = a_2 \times 10^{-4} \text{ eV/K} \quad (4)$$

where  $a_1$  and  $a_2$  is a fitting parameter for the energy offset and band gap, respectively.

From Fermi-Dirac statistics, carrier concentration of each band is given by following equation:

$$n_{C_L} = 2 \left( \frac{2\pi m_{C_L}^* k_B T}{h^2} \right)^{\frac{3}{2}} F_{1/2}(\eta_{C_L}) \quad (5)$$

$$n_{C_H} = 2 \left( \frac{2\pi m_{C_H}^* k_B T}{h^2} \right)^{\frac{3}{2}} F_{1/2}(\eta_{C_H}) \quad (6)$$

$$p_V = 2 \left( \frac{2\pi m_V^* k_B T}{h^2} \right)^{\frac{3}{2}} F_{1/2}(\eta_V) \quad (7)$$

where  $n_{C_L}$ ,  $n_{C_H}$ , and  $p_V$ , and  $m_{C_L}^*$ ,  $m_{C_H}^*$ , and  $m_V^*$  are the carrier concentration and density-of-states effective mass of L band, H band, and V band, respectively.  $k_B$  is Boltzmann constant, and  $h$  is Planck constant. Fermi-Dirac integral with order of  $i$  is defined as follow.

$$F_i(\eta) = \int_0^\infty \frac{u^i}{1 + \exp\left(\frac{u - \eta}{k_B T}\right)} du \quad (8)$$

Hence, total carrier concentration is the sum of  $n_{C_L}$ ,  $n_{C_H}$ , and  $p_V$ .

To calculate the mobility of charge carriers, deformation potential scattering (acoustic phonon scattering) and

alloy scattering were considered. The carrier mobility for deformation potential scattering is expressed as follow:

$$\mu_{e-ph} = \frac{\sqrt{2}\pi e \hbar^4}{3(k_B T)^{3/2} (E_{def})^2 (m_b^*)^{5/2} F_{1/2}(\eta)} \frac{v^2 \rho}{F_0(\eta)} \quad (9)$$

where  $m_b^*$  is the band effective mass,  $E_{def}$  is deformation potential,  $v$  is the longitudinal sound velocity,  $\rho$  is the bulk density,  $\hbar$  is reduced Planck constant, and  $e$  is the elementary charge.

Similarly, the mobility of charge carriers by alloy scattering is given by following equation:

$$\mu_{alloy} = \frac{16e \hbar^4}{9\sqrt{2}\pi x(1-x)(k_B T)^{1/2} U^2 (m_b^*)^{5/2} F_{1/2}(\eta)} \frac{N_0}{F_0(\eta)} \quad (10)$$

where  $N_0$  is the number density of the atoms in the unit cell,  $x$  is the fractional occupation of the alloying element, and  $U$  is the alloy scattering potential. The total carrier mobility was calculated by Matthiessen's rule.

The Seebeck coefficient of each band for acoustic phonon scattering is given by following equation:

$$S_{C_L}(\eta_{C_L}) = -\frac{e}{k_B} \left( \frac{F_1(\eta_{C_L})}{F_0(\eta_{C_L})} - \eta_{C_L} \right) \quad (11)$$

$$S_{C_H}(\eta_{C_H}) = -\frac{e}{k_B} \left( \frac{F_1(\eta_{C_H})}{F_0(\eta_{C_H})} - \eta_{C_H} \right) \quad (12)$$

$$S_V(\eta_V) = -\frac{e}{k_B} \left( \frac{F_1(\eta_V)}{F_0(\eta_V)} - \eta_V \right) \quad (13)$$

Total electrical conductivity and total Seebeck coefficient are given by following equation:

$$\sigma_{tot} = \sigma_{C_L} + \sigma_{C_H} + \sigma_V \quad (14)$$

$$S_{tot} = \frac{S_{C_L} \sigma_{C_L} + S_{C_H} \sigma_{C_H} + S_V \sigma_V}{\sigma_{tot}} \quad (15)$$

Table below summarizes material parameters used to calculate PF by the three-band model. Note that other sets of parameters may exist which give better fittings to the experimental values.

| Symbols     | Description                            | Value             |
|-------------|----------------------------------------|-------------------|
| $m_{C_L}^*$ | L band effective mass                  | 0.4 $m_0$         |
| $m_{C_H}^*$ | H band effective mass                  | 12.0 $m_0$        |
| $m_V^*$     | V band effective mass                  | 3.0 $m_0$         |
| $\Delta$    | Band offset between L band and H band. | 0.176-0.00022T eV |

|           |                                            |                   |
|-----------|--------------------------------------------|-------------------|
| $E_g$     | Band gap between L band and V band.        | 0.588-0.00003T eV |
| $E_{def}$ | Deformation potential of C band and L band | 11.68 eV          |
| $U$       | Alloy scattering potential                 | 2.0 eV            |
| $v$       | Longitudinal sound velocity                | 3280 m/s          |
| $N_{v,L}$ | Valley degeneracy of L band                | 3                 |
| $N_{v,H}$ | Valley degeneracy of H band                | 6                 |
| $N_{v,V}$ | Valley degeneracy of V band                | 3                 |

**Table S8.** Material parameters used for the three-band model calculation.
